# Supplementary material for: The D2 Dopamine Receptor Interferes With the Protective Effect of the A2A Adenosine Receptor on TDP-43 Mislocalization in Experimental Models of Motor Neuron Degeneration
Source: PubMed Central journal article supplement (PMC5869924; doi:10.3389/fnins.2018.00187), 2018-03-20
Supplement: Presentation1.pdf [file Presentation1.pdf]

## Supplementary Material

**Full title:**        **The D2 dopamine receptor interferes with the protective effect of the A<sub>2A</sub> adenosine receptor on TDP-43 mislocalization in experimental models of motor neuron degeneration**

**Authors:**        Chia-You Lai<sup>1,2</sup>, Yu-Ju Liu<sup>2</sup>, Hsing-Lin Lai<sup>2</sup>, Hui-Mei Chen<sup>2</sup>, Hung-Chi Kuo<sup>3</sup>, Yu-Ping Liao<sup>2</sup> and Yijuang Chern<sup>1,2</sup>

**Affiliations:**    <sup>1</sup> Institute of Life Sciences, National Defense Medical Center, Taipei, Taiwan; <sup>2</sup> Institute of Biomedical Sciences, Academia Sinica, Taipei, Taiwan; <sup>3</sup> Institute of Cellular and Organismic Biology, Academia Sinica

**Corresponding author:**

Yijuang Chern, Institute of Biomedical Sciences, Academia Sinica, Taipei 115, Taiwan

Tel: 886-2-26523913

Fax: 886-2-27829143

E-mail: [bmychern@ibms.sinica.edu.tw](mailto:bmychern@ibms.sinica.edu.tw)

## Supplementary Material

### *Receptor binding assay*

NSC34 cells were sonicated for 30 seconds on ice with 1 mL of homogenization buffer (25 mM Tris, pH 8.0, 1 mM EGTA, 1 mM MgCl<sub>2</sub>, 100 μM phenylmethylsulfonyl fluoride, 10 nM okadaic acid, 40 μM leupeptin, EDTA-free Protease Inhibitor and phosStop) and centrifuged at 1000 x g for 10 min at 4 °C. Supernatants were transferred to centrifuge tubes (rotor TLA100.3; BECKMAN) and centrifuged at 50,000 x g for 1 h at 4 °C. Pellets were harvested and suspended in 0.2 mL of lysis buffer (20 mM HEPES, pH 8.0, 0.2 mM MgCl<sub>2</sub>, 0.2 mM EGTA, 0.1 mM leupeptin, 40 μM phenylmethylsulfonyl fluoride, 30 nM okadaic acid, 0.2 mM sodium orthovanadate, EDTA-free Protease Inhibitor and phosStop). The protein concentrations were determined using the Bradford protein assay (Bio-RAD). Samples were stored at -80 °C. For the binding assays, membranes were incubated with the indicated concentrations of T1-11 in the absence or presence of quinpirole (a D<sub>2</sub>R agonist; 1 μM), together with 50 nM of <sup>3</sup>H-CGS21680 in a volume of 250 μl of incubation buffer (25 mM HEPES, 140 mM NaCl, 5.4 mM KCl, 1 mM EDTA and 0.3 % BSA, pH 7.4) for 90 min at 25 °C. The inhibition constant ( $K_i$ ) values were calculated as previously described (Cheng and Prusoff 1973). Excess free ligands were removed using a vacuum filtration manifold with glass microfiber filters GF/C (MERCK Millipore, USA). After extensive washes, the radioactivity of <sup>3</sup>H-CGS21680 remaining on the filters was measured by a β counter (BECKMAN, USA).

### *Animals and drug(s) administration*

Wildtype mice were fed with T1-11 (0.25 mg/ml) (Huang, Lin et al. 2011) or vehicle (1% DMSO) in their drinking water. Quinpirole (6 mg/kg; (de Haas, Seddik et al. 2012)) or saline was given to animals by a daily intraperitoneal injection. To assess the involvement of D<sub>2</sub>R, a potent D<sub>2</sub>-selective antagonist (L741,626, L74, 10 mg/kg, intraperitoneal injection, Tocris; (Bowery, Rothwell et al. 1994)) or vehicle (10% DMSO plus 10% kolliphorEL (Sigma) in saline) was given 10 min before the daily injection of quinpirole.

## Supplementary Figure Legends

Fig S1.

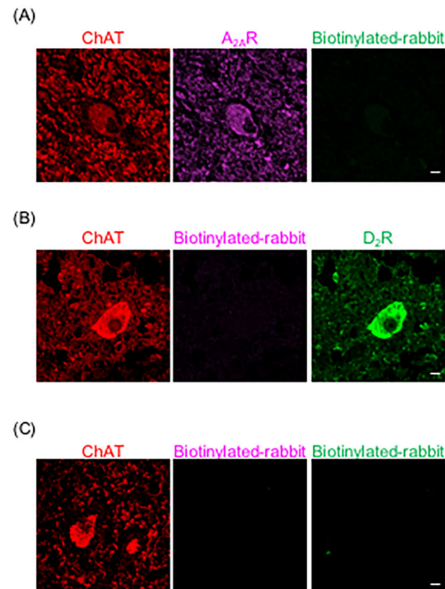

**Figure S1. Negative controls of TSA immunostaining with A<sub>2A</sub>R or D<sub>2</sub>R in motor neurons of human spinal cord sections.** (A) Human spinal cord sections were stained with an anti-A<sub>2A</sub>R (purple, A) alone or an anti-D<sub>2</sub>R antibody alone (green, B) or no antibodies (C), and a motor neuron marker (ChAT, red), followed by a TSA-amplified immunofluorescence method. Scale bars: 10  $\mu$ m.

Fig S2.

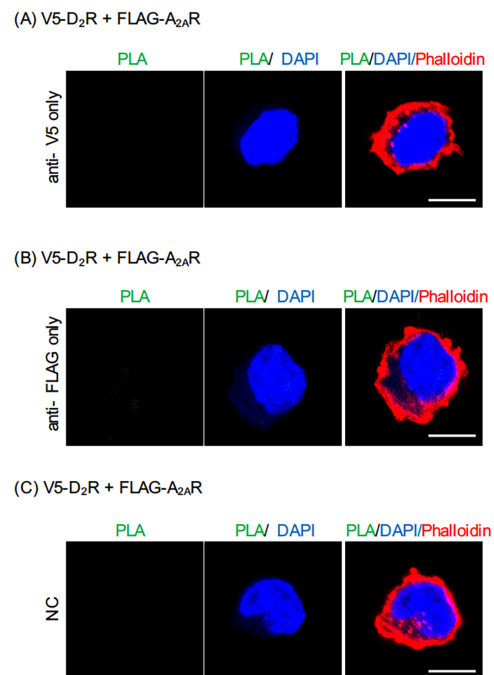

**Figure S2. Negative controls of the PLA assay.** NSC34 cells were transfected with V5-D<sub>2</sub>R and FLAG-A<sub>2A</sub>R for 48 h. Cells were immunostained with only a V5 antibody (A) or a FLAG antibody (B) or no antibodies (C). NC: negative control. Microfilaments were observed using rhodamine-phalloidin (red). Scale bars: 10  $\mu$ m.

Fig S3.

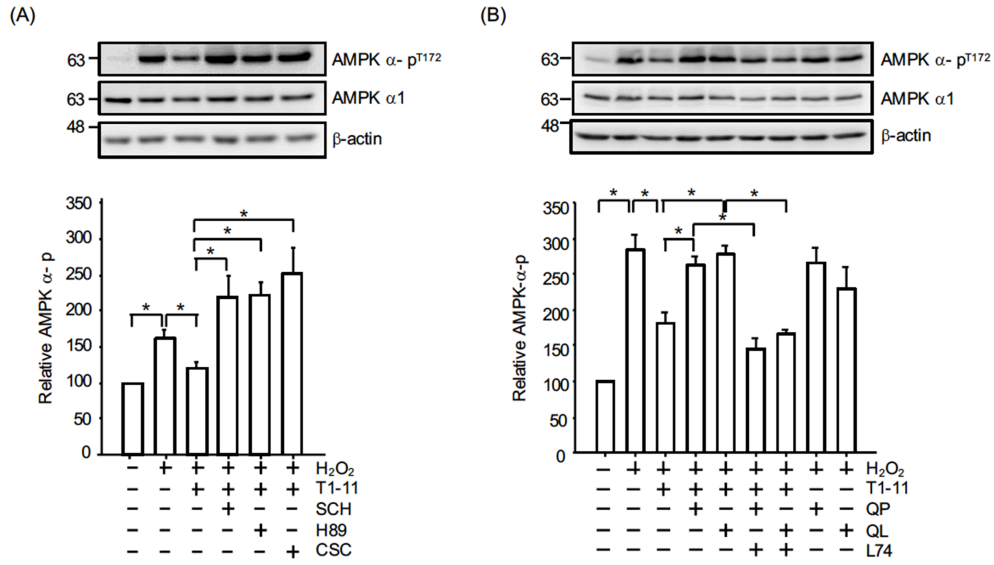

**Figure S3. Activation of D<sub>2</sub>R suppressed the A<sub>2A</sub>R-mediated inhibition of AMPK activity.** (A) NSC34 cells were treated with the indicated drug(s) [H<sub>2</sub>O<sub>2</sub>, 500 μM; T1-11, 30 μM; SCH58261 (SCH; an A<sub>2A</sub>R antagonist, 10 μM); H89 (a PKA inhibitor, 5 μM); CSC (an A<sub>2A</sub>R antagonist, 10 μM)]. (B) NSC34 cells were treated with the indicated drug(s) [H<sub>2</sub>O<sub>2</sub>, 500 μM; T1-11, 30 μM; QP (1 μM); quinelorane (QL; a D<sub>2</sub>R agonist; 1 μM) or L741,626 (L74; a selective D<sub>2</sub>R antagonist, 10 μM)] for 4 h, and analyzed for AMPK activation by Western blot analyses. \* *p* < 0.05, statistically different between the indicated groups. Data are presented as the mean ± SEM of three individual experiments.

Fig S4.

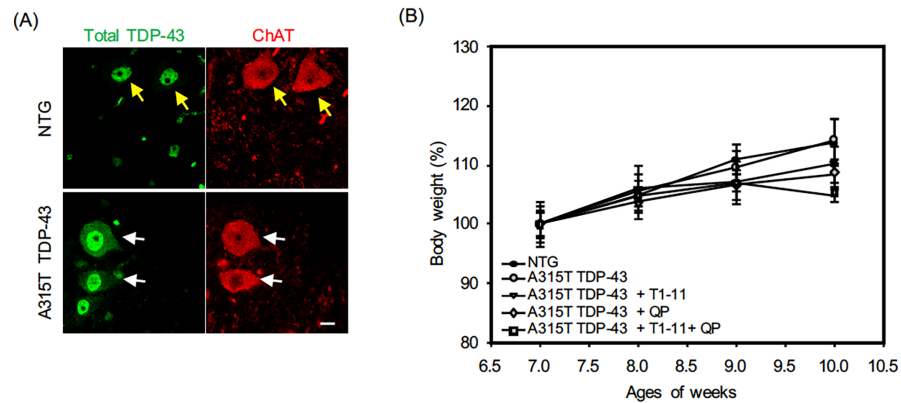

**Figure S4. TDP-43 mislocalization and body weight of A315T TDP-43 mice.** NTG and A315T TDP-43 were treated with T1-11 (0.25 mg/ml) or vehicle (1 % DMSO) in the drinking water and co-treated with QP (6 mg/kg) or saline by intraperitoneal injection from the age of 7 weeks (N= 5-7). (A) Spinal cord sections of NTG and A315T TDP-43 mice were stained with a mouse/human TDP-43 antibody (green) and a motor neuron marker (ChAT, red) at the age of 10 weeks old. The yellow arrow indicates TDP-43 located in the nucleus. The white arrow marks TDP-43 mislocalization. Scale bars: 10  $\mu$ m. (B) Body weight of NTG and A315T TDP-43 were measured weekly. Data are presented as the mean  $\pm$  SEM.

Fig S5.

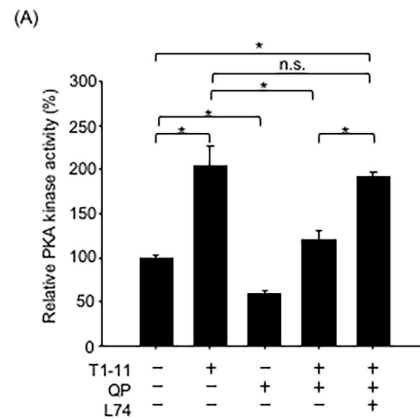

**Figure S5. Activation of D<sub>2</sub>R inhibited the A<sub>2A</sub>R-mediated PKA activity *in vivo*.**

(A) Wildtype mice were treated with T1-11 (0.25 mg/ml) or vehicle (1% DMSO) in the drinking water and co-treated with QP (6 mg/kg) or saline by intraperitoneal injection from the age of 7 weeks. To assess the involvement of D<sub>2</sub>R, a potent D<sub>2</sub>-selective antagonist L741,626 (L74, 10 mg/kg, intraperitoneal injection) or vehicle was given 10 min before the daily injection of QP as indicated. Spinal cords from the indicated mice were harvested to examine PKA activity at the age of 9 weeks (N = 4).

\*  $p < 0.05$ , statistically different between the indicated groups. n.s., not significant.

## Reference

Cheng, Y. and W. H. Prusoff (1973). "Relationship between the inhibition constant (K<sub>i</sub>) and the concentration of inhibitor which causes 50 per cent inhibition (I<sub>50</sub>) of an enzymatic reaction." Biochem Pharmacol 22(23): 3099-3108.
